# Supplementary material for: Psychometric Properties of the Generalized Anxiety Disorder Scale-7 Item (GAD-7) in a Large Sample of Chinese Adolescents
Source: MDPI journal article supplement (doi:10.3390/healthcare9121709), 2021-12-09
Supplement: s1 [file s1]

**Table S1.** Participants' socio-demographic information.

| Variables          |                               | N (%)         |
|--------------------|-------------------------------|---------------|
| Gender             | Boys                          | 34,909 (51.9) |
|                    | Girls                         | 32,372 (48.1) |
| Grade              | Primary school                | 27,954 (41.5) |
|                    | Junior middle school          | 27,124 (40.3) |
|                    | High school                   | 12,203 (18.1) |
| Puberty status     | Non-pubertal                  | 33,288 (49.5) |
|                    | Pubertal                      | 33,993 (50.5) |
| Weight status      | Normal                        | 45,817 (68.1) |
|                    | Overweight                    | 9051 (13.5)   |
|                    | Obese                         | 12,413 (18.4) |
| Siblings           | Only child                    | 17,354 (25.8) |
|                    | Non-only child                | 49,927 (74.2) |
| Family structure   | Full                          | 62,836 (93.4) |
|                    | Other                         | 4445 (6.6)    |
| Paternal education | Junior middle school or below | 14,619 (21.7) |
|                    | High school or equivalent     | 18,159 (27.0) |
|                    | Bachelor or equivalent        | 26,030 (38.7) |
|                    | Master or above               | 2796 (4.2)    |
|                    | Unclear                       | 5677 (8.4)    |
| Maternal education | Junior middle school or below | 17,617 (26.2) |
|                    | High school or equivalent     | 18,706 (27.8) |
|                    | Bachelor or equivalent        | 23,922 (35.6) |
|                    | Master or above               | 1635 (2.4)    |
|                    | Unclear                       | 5401 (8.0)    |
| Nationality        | Han                           | 65,027 (96.6) |
|                    | minority                      | 2254 (3.4)    |

|                                               |     |                  |
|-----------------------------------------------|-----|------------------|
| Attending schools in Shenzhen since childhood | Yes | 61,969 (92.1)    |
|                                               | No  | 5312 (7.9)       |
| <b>Variables</b>                              |     | <b>Mean (SD)</b> |
| Age (years)                                   |     | 13.0 (1.8)       |
| Subjective family socioeconomic status        |     | 5.0 (1.7)        |

Note: SD: standard deviation.

**Table S2.** Descriptive characteristics of item scores and total scores by subgroups.

| Item         | Age      | Males |      | Females |      | Age      | Males |      | Females |      |
|--------------|----------|-------|------|---------|------|----------|-------|------|---------|------|
|              |          | Mean  | SD   | Mean    | SD   |          | Mean  | SD   | Mean    | SD   |
| Item 1       | 10 years | 0.33  | 0.64 | 0.37    | 0.66 | 14 years | 0.52  | 0.73 | 0.70    | 0.82 |
| Item 2       |          | 0.28  | 0.63 | 0.32    | 0.67 |          | 0.44  | 0.74 | 0.64    | 0.85 |
| Item 3       |          | 0.33  | 0.68 | 0.36    | 0.71 |          | 0.54  | 0.80 | 0.74    | 0.90 |
| Item 4       |          | 0.34  | 0.70 | 0.38    | 0.74 |          | 0.53  | 0.81 | 0.69    | 0.89 |
| Item 5       |          | 0.27  | 0.62 | 0.26    | 0.60 |          | 0.39  | 0.70 | 0.43    | 0.73 |
| Item 6       |          | 0.37  | 0.69 | 0.43    | 0.76 |          | 0.53  | 0.80 | 0.74    | 0.91 |
| Item 7       |          | 0.36  | 0.74 | 0.43    | 0.78 |          | 0.48  | 0.80 | 0.60    | 0.86 |
| Total scores |          | 2.27  | 3.92 | 2.55    | 4.25 |          | 3.43  | 4.63 | 4.53    | 5.16 |
| Item 1       | 11 years | 0.32  | 0.62 | 0.39    | 0.68 | 15 years | 0.57  | 0.73 | 0.73    | 0.79 |
| Item 2       |          | 0.27  | 0.61 | 0.36    | 0.69 |          | 0.50  | 0.75 | 0.68    | 0.83 |
| Item 3       |          | 0.33  | 0.67 | 0.42    | 0.73 |          | 0.6   | 0.78 | 0.78    | 0.86 |
| Item 4       |          | 0.34  | 0.70 | 0.41    | 0.75 |          | 0.58  | 0.82 | 0.70    | 0.84 |
| Item 5       |          | 0.27  | 0.62 | 0.28    | 0.61 |          | 0.41  | 0.68 | 0.43    | 0.68 |
| Item 6       |          | 0.36  | 0.69 | 0.45    | 0.77 |          | 0.54  | 0.76 | 0.70    | 0.84 |
| Item 7       |          | 0.35  | 0.73 | 0.44    | 0.78 |          | 0.45  | 0.73 | 0.53    | 0.78 |
| Total scores |          | 2.25  | 3.88 | 2.74    | 4.29 |          | 3.65  | 4.50 | 4.54    | 4.87 |
| Item 1       | 12 years | 0.39  | 0.68 | 0.52    | 0.75 | 16 years | 0.64  | 0.76 | 0.78    | 0.8  |
| Item 2       |          | 0.32  | 0.65 | 0.47    | 0.77 |          | 0.57  | 0.76 | 0.72    | 0.83 |
| Item 3       |          | 0.38  | 0.71 | 0.55    | 0.81 |          | 0.67  | 0.80 | 0.81    | 0.85 |
| Item 4       |          | 0.38  | 0.73 | 0.53    | 0.83 |          | 0.64  | 0.80 | 0.73    | 0.84 |
| Item 5       |          | 0.29  | 0.64 | 0.35    | 0.67 |          | 0.45  | 0.71 | 0.47    | 0.71 |

|              |          |      |      |      |      |          |      |      |      |      |
|--------------|----------|------|------|------|------|----------|------|------|------|------|
| Item 6       |          | 0.40 | 0.73 | 0.59 | 0.84 |          | 0.57 | 0.78 | 0.74 | 0.83 |
| Item 7       |          | 0.39 | 0.75 | 0.52 | 0.83 |          | 0.47 | 0.75 | 0.52 | 0.78 |
| Total scores |          | 2.55 | 4.15 | 3.53 | 4.75 |          | 4.02 | 4.67 | 4.76 | 4.87 |
| Item 1       |          | 0.48 | 0.71 | 0.65 | 0.8  |          | 0.67 | 0.77 | 0.77 | 0.76 |
| Item 2       |          | 0.39 | 0.70 | 0.60 | 0.84 |          | 0.6  | 0.78 | 0.70 | 0.81 |
| Item 3       |          | 0.48 | 0.76 | 0.70 | 0.88 |          | 0.69 | 0.82 | 0.81 | 0.83 |
| Item 4       | 13 years | 0.47 | 0.78 | 0.65 | 0.88 | 17 years | 0.65 | 0.84 | 0.73 | 0.82 |
| Item 5       |          | 0.36 | 0.68 | 0.41 | 0.7  |          | 0.47 | 0.73 | 0.45 | 0.66 |
| Item 6       |          | 0.50 | 0.78 | 0.70 | 0.88 |          | 0.58 | 0.78 | 0.73 | 0.80 |
| Item 7       |          | 0.44 | 0.78 | 0.57 | 0.85 |          | 0.49 | 0.74 | 0.51 | 0.74 |
| Total scores |          | 3.12 | 4.42 | 4.28 | 5.06 |          | 4.14 | 4.76 | 4.70 | 4.63 |

Note: SD = standard deviations.

**Table S3.** Correlation of between items in male adolescents by age groups.

| Age      | Item   | Item 1 | Item 2 | Item 3 | Item 4 | Item 5 | Item 6 | Item 7 |
|----------|--------|--------|--------|--------|--------|--------|--------|--------|
| 10 years | Item 1 | 1      |        |        |        |        |        |        |
|          | Item 2 | 0.74   | 1      |        |        |        |        |        |
|          | Item 3 | 0.74   | 0.76   | 1      |        |        |        |        |
|          | Item 4 | 0.68   | 0.67   | 0.69   | 1      |        |        |        |
|          | Item 5 | 0.62   | 0.6    | 0.62   | 0.64   | 1      |        |        |
|          | Item 6 | 0.65   | 0.6    | 0.6    | 0.65   | 0.67   | 1      |        |
|          | Item 7 | 0.59   | 0.61   | 0.64   | 0.6    | 0.6    | 0.59   | 1      |
| 11 years | Item 1 | 1      |        |        |        |        |        |        |
|          | Item 2 | 0.76   | 1      |        |        |        |        |        |
|          | Item 3 | 0.73   | 0.75   | 1      |        |        |        |        |
|          | Item 4 | 0.67   | 0.71   | 0.7    | 1      |        |        |        |
|          | Item 5 | 0.61   | 0.63   | 0.63   | 0.65   | 1      |        |        |
|          | Item 6 | 0.64   | 0.65   | 0.64   | 0.66   | 0.69   | 1      |        |
|          | Item 7 | 0.58   | 0.6    | 0.63   | 0.6    | 0.62   | 0.59   | 1      |
| 12 years | Item 1 | 1      |        |        |        |        |        |        |
|          | Item 2 | 0.77   | 1      |        |        |        |        |        |

|          |        |      |      |      |      |      |      |   |
|----------|--------|------|------|------|------|------|------|---|
|          | Item 3 | 0.75 | 0.77 | 1    |      |      |      |   |
|          | Item 4 | 0.7  | 0.73 | 0.73 | 1    |      |      |   |
|          | Item 5 | 0.64 | 0.66 | 0.66 | 0.68 | 1    |      |   |
|          | Item 6 | 0.66 | 0.66 | 0.67 | 0.69 | 0.71 | 1    |   |
|          | Item 7 | 0.62 | 0.63 | 0.67 | 0.63 | 0.62 | 0.63 | 1 |
|          | Item 1 | 1    |      |      |      |      |      |   |
|          | Item 2 | 0.75 | 1    |      |      |      |      |   |
| 13 years | Item 3 | 0.74 | 0.78 | 1    |      |      |      |   |
|          | Item 4 | 0.7  | 0.71 | 0.74 | 1    |      |      |   |
|          | Item 5 | 0.65 | 0.67 | 0.66 | 0.66 | 1    |      |   |
|          | Item 6 | 0.66 | 0.65 | 0.67 | 0.66 | 0.69 | 1    |   |
|          | Item 7 | 0.62 | 0.64 | 0.66 | 0.64 | 0.65 | 0.64 | 1 |
|          | Item 1 | 1    |      |      |      |      |      |   |
|          | Item 2 | 0.78 | 1    |      |      |      |      |   |
| 14 years | Item 3 | 0.75 | 0.79 | 1    |      |      |      |   |
|          | Item 4 | 0.72 | 0.75 | 0.77 | 1    |      |      |   |
|          | Item 5 | 0.68 | 0.68 | 0.67 | 0.71 | 1    |      |   |
|          | Item 6 | 0.67 | 0.68 | 0.67 | 0.7  | 0.71 | 1    |   |
|          | Item 7 | 0.64 | 0.68 | 0.69 | 0.68 | 0.69 | 0.65 | 1 |
|          | Item 1 | 1    |      |      |      |      |      |   |
|          | Item 2 | 0.75 | 1    |      |      |      |      |   |
| 15 years | Item 3 | 0.73 | 0.82 | 1    |      |      |      |   |
|          | Item 4 | 0.71 | 0.75 | 0.77 | 1    |      |      |   |
|          | Item 5 | 0.62 | 0.66 | 0.65 | 0.68 | 1    |      |   |
|          | Item 6 | 0.64 | 0.67 | 0.66 | 0.67 | 0.69 | 1    |   |
|          | Item 7 | 0.62 | 0.66 | 0.66 | 0.64 | 0.67 | 0.67 | 1 |
|          | Item 1 | 1    |      |      |      |      |      |   |
|          | Item 2 | 0.8  | 1    |      |      |      |      |   |
| 16 years | Item 3 | 0.78 | 0.83 | 1    |      |      |      |   |
|          | Item 4 | 0.76 | 0.77 | 0.78 | 1    |      |      |   |

|          |        |      |      |      |      |      |      |   |
|----------|--------|------|------|------|------|------|------|---|
| 17 years | Item 5 | 0.68 | 0.71 | 0.68 | 0.71 | 1    |      |   |
|          | Item 6 | 0.71 | 0.71 | 0.7  | 0.73 | 0.76 | 1    |   |
|          | Item 7 | 0.65 | 0.67 | 0.67 | 0.66 | 0.7  | 0.67 | 1 |
|          | Item 1 | 1    |      |      |      |      |      |   |
|          | Item 2 | 0.84 | 1    |      |      |      |      |   |
|          | Item 3 | 0.79 | 0.82 | 1    |      |      |      |   |
|          | Item 4 | 0.76 | 0.78 | 0.79 | 1    |      |      |   |
|          | Item 5 | 0.68 | 0.73 | 0.68 | 0.7  | 1    |      |   |
|          | Item 6 | 0.68 | 0.73 | 0.7  | 0.69 | 0.77 | 1    |   |
|          | Item 7 | 0.65 | 0.68 | 0.66 | 0.64 | 0.69 | 0.67 | 1 |

Table S4. Correlation of between items in female adolescents by age groups.

| Age      | Item   | Item 1 | Item 2 | Item 3 | Item 4 | Item 5 | Item 6 | Item 7 |
|----------|--------|--------|--------|--------|--------|--------|--------|--------|
| 10 years | Item 1 | 1.00   |        |        |        |        |        |        |
|          | Item 2 | 0.74   | 1.00   |        |        |        |        |        |
|          | Item 3 | 0.74   | 0.84   | 1.00   |        |        |        |        |
|          | Item 4 | 0.72   | 0.77   | 0.74   | 1.00   |        |        |        |
|          | Item 5 | 0.65   | 0.69   | 0.66   | 0.68   | 1.00   |        |        |
|          | Item 6 | 0.69   | 0.73   | 0.69   | 0.71   | 0.69   | 1.00   |        |
|          | Item 7 | 0.67   | 0.72   | 0.72   | 0.71   | 0.60   | 0.68   | 1.00   |
| 11 years | Item 1 | 1.00   |        |        |        |        |        |        |
|          | Item 2 | 0.77   | 1.00   |        |        |        |        |        |
|          | Item 3 | 0.74   | 0.79   | 1.00   |        |        |        |        |
|          | Item 4 | 0.72   | 0.75   | 0.77   | 1.00   |        |        |        |
|          | Item 5 | 0.65   | 0.66   | 0.65   | 0.67   | 1.00   |        |        |
|          | Item 6 | 0.67   | 0.67   | 0.67   | 0.68   | 0.69   | 1.00   |        |
|          | Item 7 | 0.64   | 0.64   | 0.68   | 0.66   | 0.63   | 0.67   | 1.00   |
| 12 years | Item 1 | 1.00   |        |        |        |        |        |        |
|          | Item 2 | 0.78   | 1.00   |        |        |        |        |        |
|          | Item 3 | 0.75   | 0.81   | 1.00   |        |        |        |        |
|          | Item 4 | 0.73   | 0.77   | 0.77   | 1.00   |        |        |        |

|          |        |      |      |      |      |      |      |      |
|----------|--------|------|------|------|------|------|------|------|
| 13 years | Item 5 | 0.66 | 0.68 | 0.67 | 0.69 | 1.00 |      |      |
|          | Item 6 | 0.68 | 0.70 | 0.71 | 0.71 | 0.67 | 1.00 |      |
|          | Item 7 | 0.65 | 0.69 | 0.69 | 0.69 | 0.65 | 0.68 | 1.00 |
|          | Item 1 | 1.00 |      |      |      |      |      |      |
|          | Item 2 | 0.80 | 1.00 |      |      |      |      |      |
|          | Item 3 | 0.76 | 0.82 | 1.00 |      |      |      |      |
|          | Item 4 | 0.73 | 0.77 | 0.77 | 1.00 |      |      |      |
| 14years  | Item 5 | 0.66 | 0.68 | 0.65 | 0.68 | 1.00 |      |      |
|          | Item 6 | 0.70 | 0.71 | 0.71 | 0.71 | 0.68 | 1.00 |      |
|          | Item 7 | 0.65 | 0.68 | 0.69 | 0.67 | 0.65 | 0.67 | 1.00 |
|          | Item 1 | 1.00 |      |      |      |      |      |      |
|          | Item 2 | 0.80 | 1.00 |      |      |      |      |      |
|          | Item 3 | 0.77 | 0.84 | 1.00 |      |      |      |      |
|          | Item 4 | 0.75 | 0.78 | 0.79 | 1.00 |      |      |      |
| 15 years | Item 5 | 0.66 | 0.68 | 0.65 | 0.69 | 1.00 |      |      |
|          | Item 6 | 0.69 | 0.71 | 0.70 | 0.72 | 0.68 | 1.00 |      |
|          | Item 7 | 0.67 | 0.69 | 0.69 | 0.68 | 0.66 | 0.66 | 1.00 |
|          | Item 1 | 1.00 |      |      |      |      |      |      |
|          | Item 2 | 0.81 | 1.00 |      |      |      |      |      |
|          | Item 3 | 0.77 | 0.84 | 1.00 |      |      |      |      |
|          | Item 4 | 0.75 | 0.79 | 0.79 | 1.00 |      |      |      |
| 16 years | Item 5 | 0.66 | 0.67 | 0.63 | 0.66 | 1.00 |      |      |
|          | Item 6 | 0.70 | 0.71 | 0.71 | 0.70 | 0.70 | 1.00 |      |
|          | Item 7 | 0.66 | 0.68 | 0.67 | 0.66 | 0.64 | 0.65 | 1.00 |
|          | Item 1 | 1.00 |      |      |      |      |      |      |
|          | Item 2 | 0.81 | 1.00 |      |      |      |      |      |
|          | Item 3 | 0.77 | 0.83 | 1.00 |      |      |      |      |
|          | Item 4 | 0.76 | 0.79 | 0.78 | 1.00 |      |      |      |
|          | Item 5 | 0.63 | 0.66 | 0.62 | 0.66 | 1.00 |      |      |
|          | Item 6 | 0.69 | 0.72 | 0.71 | 0.70 | 0.69 | 1.00 |      |

---

|          |        |      |      |      |      |      |      |      |
|----------|--------|------|------|------|------|------|------|------|
|          | Item 7 | 0.63 | 0.67 | 0.66 | 0.64 | 0.65 | 0.65 | 1.00 |
|          | Item 1 | 1.00 |      |      |      |      |      |      |
|          | Item 2 | 0.78 | 1.00 |      |      |      |      |      |
|          | Item 3 | 0.74 | 0.85 | 1.00 |      |      |      |      |
| 17 years | Item 4 | 0.74 | 0.79 | 0.79 | 1.00 |      |      |      |
|          | Item 5 | 0.60 | 0.62 | 0.59 | 0.64 | 1.00 |      |      |
|          | Item 6 | 0.70 | 0.73 | 0.72 | 0.71 | 0.64 | 1.00 |      |
|          | Item 7 | 0.55 | 0.62 | 0.63 | 0.61 | 0.65 | 0.63 | 1.00 |

---
